# Supplementary material for: Bioinformatic cis-element analyses performed in Arabidopsis and rice disclose bZIP- and MYB-related binding sites as potential AuxRE-coupling elements in auxin-mediated transcription
Source: PubMed Central journal article supplement (PMC3438128; doi:10.1186/1471-2229-12-125), 2012-08-01

# Arabidopsis

|            | UP    |       |       |
|------------|-------|-------|-------|
|            | 0.5 h | 1.0 h | 3.0 h |
| With Prom. | 179   | 250   | 398   |
| On Chip    | 180   | 251   | 400   |

  

|            | DOWN  |       |       |
|------------|-------|-------|-------|
|            | 0.5 h | 1.0 h | 3.0 h |
| With Prom. | 26    | 51    | 348   |
| On Chip    | 26    | 53    | 349   |

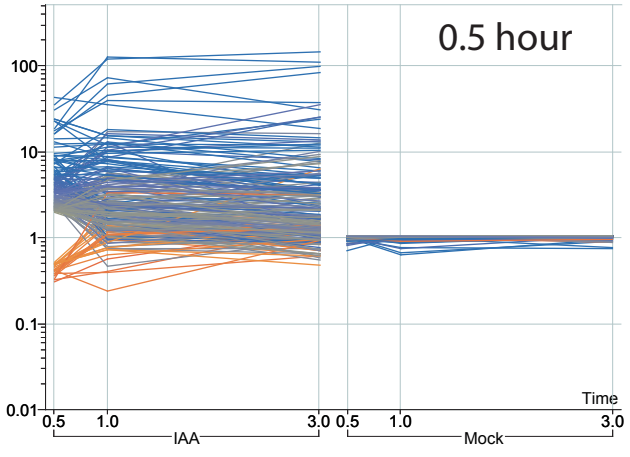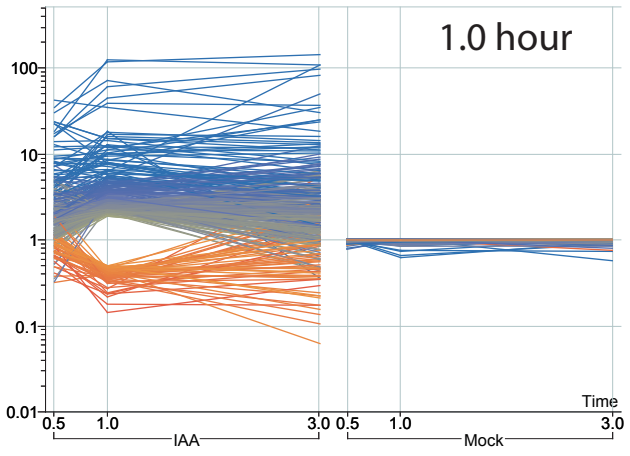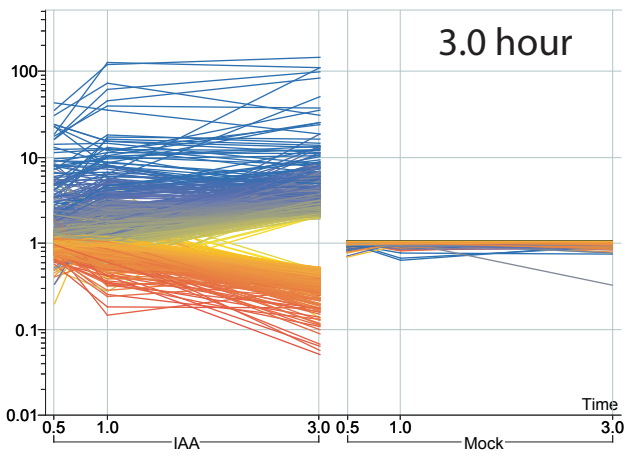

Supplement: 1471-2229-12-125-S1.pdf [file 1471-2229-12-125-S1.pdf]
