# Supplementary material for: Bioinformatic cis-element analyses performed in Arabidopsis and rice disclose bZIP- and MYB-related binding sites as potential AuxRE-coupling elements in auxin-mediated transcription
Source: PubMed Central journal article supplement (PMC3438128; doi:10.1186/1471-2229-12-125), 2012-08-01

# Rice

|          | <u>UP</u> | <u>DOWN</u> |
|----------|-----------|-------------|
| Promoter | 203       | 79          |
| OsGI     | 204       | 80          |
| Probes   | 305       | 126         |

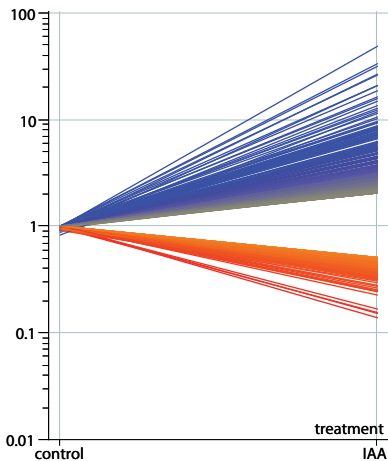

Supplement: 1471-2229-12-125-S4.pdf [file 1471-2229-12-125-S4.pdf]
